# Supplementary material for: Resistance to Plant Parasites in Tomato Is Induced by Soil Enrichment with Specific Bacterial and Fungal Rhizosphere Microbiome
Source: Preprints.org preprint supplement (doi:10.20944/preprints202309.2095.v1), 2023-09-29
Supplement: Supplementary file 3 [file supplementary]

**Tab. 1S.** Plant Height (PH), numbers of egg masses per root system (EMs), and female fecundity (FF) of tomato plants harvested 2 months after inoculation with the root-knot nematode *M. incognita*. Treatments with 0.25 g Myco and 0.08 g Ozor g-1 plant fresh weightwere carried 5 days before nematode inoculation. Means ± standard deviations for treated (Myco, Ozor) and untreated (contr) plants were separated by a paired *t-*test (**P*<0.05). In parentheses, the percentages of increase/decrease of significantly different factors

|  | **contr** | **Myco** | **contr** | **Ozor** |
| --- | --- | --- | --- | --- |
|  |  |  |  |  |
| PH | 70±19 | 65±20 | 76±12 | 81±13 |
| EMs | 94±45 | 64±31*(-32) | 88±44 | 59±16*(-33) |
| FF | 203±77 | 432±113*(113) | 214±86 | 392±217*(83) |

**Tab. 2S.** Tomato plants soil-drenched with liquid suspensions (0.5, 1.0, 2.0 108 CFU/plant) of *Bacillus subtilis* (Bt) and *Pseudomonas fluorescens* ATCC 13525 (Pf), other plants were soil-drenched with the suspensions used to grow the bacteria, and considered as the controls (Cntr). All plants were inoculated with M. incognita after 5 days. Two months after nematode inoculation growth factors, such as plant height (PH) and infection factors, such as the numbers of egg masses per root system (EMs) and female fecundity (FF), were detected. Means ± standard deviations for treated (Bt/Pf +0.5, +1.0, +2.0) and untreated (Cntr) plants were separated by a paired t-test (*P<0.05). In parentheses, the percentages of increase/decrease of significantly different factors

|  | **Cntr** | **+ 0.5 Pf** | **+ 1.0 Pf** | **+ 2.0 Pf** |
| --- | --- | --- | --- | --- |
| PH | 77±11 | 86±18 | 71±13 | 78±13 |
| EMs | 56±39 | 64±19 | 59±25 | 62±22 |
| FF | 283±54 | 376±140*(33) | 213±48*(-25) | 411±200*(45) |
|  |  |  |  |  |
|  | **Cntr** | **+ 0.5 Bt** | **+ 1.0 Bt** | **+ 2.0 Bt** |
| PH | 61±7 | 76±12*(24) | 71±10 | 76±7*(24) |
| EMs | 45±20 | 81±31*(79) | 88±32*(95) | 76±36*(68) |
| FF | 526±96 | 447±78 | 386±93*(-27) | 458±147 |
